# Supplementary material for: Repeated observation of immune gene sets enrichment in women with non-small cell lung cancer
Source: PubMed Central journal article supplement (PMC4991454; doi:10.18632/oncotarget.7943), 2016-03-06
Supplement: oncotarget-07-20282-s001.pdf [file oncotarget-07-20282-s001.pdf]

## Repeated observation of immune gene sets enrichment in women with non-small cell lung cancer

### Supplementary Materials

**Supplementary Table S1: Immune gene sets according to GO biological processes enriched in women**

| Dataset  | Gene Ontology Term                  | GO Term    | NES                           | NOM <i>p</i> -val | FDR <i>q</i> -val | Tissue     | Description |
|----------|-------------------------------------|------------|-------------------------------|-------------------|-------------------|------------|-------------|
| GSE50081 | IMMUNE_RESPONSE                     | GO:0006955 | -2.141816                     | 0                 | 0.00495013        | TUMOR      | Smokers     |
| GSE47115 |                                     |            | -2.0355432                    | 0                 | 0.05654139        | TUMOR      | Smokers     |
| GSE32863 |                                     |            | -1.8873783                    | 0                 | 0.04999797        | TUMOR      | Non-Smokers |
| GSE32863 |                                     |            | -2.187301                     | 0                 | 0.00407708        | TUMOR      | Smokers     |
| TCGA     |                                     |            | -2.1322112                    | 0                 | 0.110324          | TUMOR      | Smokers     |
| TCGA     |                                     |            | -1.6349066                    | 0                 | 0.24177992        | TUMOR      | Non-Smokers |
| GSE50081 |                                     |            | IMMUNE_SYSTEM_PROCESS         | GO:0002376        | -2.027211         | 0          | 0.01091849  |
| GSE47115 | -1.9008057                          | 0          |                               |                   | 0.08669692        | TUMOR      | Smokers     |
| GSE32863 | -2.025273                           | 0          |                               |                   | 0.01954763        | TUMOR      | Non-Smokers |
| GSE32863 | -2.1147306                          | 0          |                               |                   | 0.00373852        | TUMOR      | Smokers     |
| TCGA     | -1.9406003                          | 0          |                               |                   | 0.07627276        | TUMOR      | Smokers     |
| TCGA     | -1.644219                           | 0          |                               |                   | 0.24277365        | TUMOR      | Non-Smokers |
| GSE50081 | CELLULAR_DEFENSE_RESPONSE           | GO:0006968 |                               |                   | -1.8251283        | 0.00248756 | 0.05018073  |
| GSE47115 |                                     |            | -1.6079495                    | 0.00784929        | 0.19234282        | TUMOR      | Smokers     |
| GSE32863 |                                     |            | -1.9247202                    | 0                 | 0.04471115        | TUMOR      | Non-Smokers |
| GSE32863 |                                     |            | -1.9325396                    | 0.00175131        | 0.04304432        | TUMOR      | Smokers     |
| TCGA     |                                     |            | -1.7326139                    | 0.00715564        | 0.07209199        | TUMOR      | Smokers     |
| GSE50081 |                                     |            | DEFENSE_RESPONSE              | GO:0006952        | -2.2449086        | 0          | 0.0026197   |
| GSE47115 | -1.746567                           | 0          |                               |                   | 0.13567683        | TUMOR      | Smokers     |
| GSE32863 | -1.9226836                          | 0          |                               |                   | 0.04044157        | TUMOR      | Non-Smokers |
| GSE32863 | -2.1175356                          | 0          |                               |                   | 0.00560778        | TUMOR      | Smokers     |
| TCGA     | -2.112328                           | 0          |                               |                   | 0.06187405        | TUMOR      | Smokers     |
| GSE50081 | REGULATION_OF_IMMUNE_SYSTEM_PROCESS | GO:0002682 |                               |                   | -1.7209327        | 0.00253165 | 0.08929511  |
| GSE47115 |                                     |            | -1.6360501                    | 0.0060423         | 0.2184723         | TUMOR      | Smokers     |
| GSE10072 |                                     |            | -1.6696321                    | 0.00543478        | 0.11862037        | NORMAL     | Non-Smokers |
| GSE32863 |                                     |            | -1.6818429                    | 0.00176991        | 0.1548676         | TUMOR      | Smokers     |
| TCGA     |                                     |            | -1.6231375                    | 0.00374532        | 0.23759808        | TUMOR      | Non-Smokers |
| GSE50081 |                                     |            | CYTOKINE_BIOSYNTHETIC_PROCESS | GO:0042089        | -1.9806778        | 0.00246914 | 0.01618297  |
| GSE50081 | -1.6930139                          | 0.00135685 |                               |                   | 0.16829406        | TUMOR      | Non-Smokers |
| GSE10072 | -1.6159624                          | 0.01408451 |                               |                   | 0.1357506         | NORMAL     | Non-Smokers |
| GSE32863 | -1.55206                            | 0.00915751 |                               |                   | 0.23396383        | TUMOR      | Smokers     |
| GSE47115 | -1.677544                           | 0.00649351 |                               |                   | 0.19688377        | TUMOR      | Smokers     |
| GSE32863 | HUMORAL_IMMUNE_RESPONSE             | GO:0006959 | -1.6820558                    | 0.00551471        | 0.16195275        | TUMOR      | Non-Smokers |
| GSE32863 |                                     |            | -1.7178334                    | 0.0053286         | 0.1281885         | TUMOR      | Smokers     |
| TCGA     |                                     |            | -1.7834922                    | 0.00568182        | 0.07305726        | TUMOR      | Smokers     |

|          |                                                      |            |            |            |            |        |             |
|----------|------------------------------------------------------|------------|------------|------------|------------|--------|-------------|
| GSE50081 | INFLAMMATORY_RESPONSE                                | GO:0006954 | -2.1959457 | 0          | 0.00394936 | TUMOR  | Smokers     |
| GSE32863 |                                                      |            | -1.6383127 | 0          | 0.17906307 | TUMOR  | Non-Smokers |
| GSE32863 |                                                      |            | -1.8924664 | 0          | 0.05366586 | TUMOR  | Smokers     |
| TCGA     |                                                      |            | -1.9676802 | 0          | 0.09290282 | TUMOR  | Smokers     |
| GSE50081 | INNATE_IMMUNE_RESPONSE                               | GO:004508  | -1.8000206 | 0.00833333 | 0.05371597 | TUMOR  | Smokers     |
| GSE50081 |                                                      |            | -1.6167494 | 0.0130246  | 0.22084205 | TUMOR  | Non-Smokers |
| TCGA     |                                                      |            | -1.9162349 | 0.00705467 | 0.06925158 | TUMOR  | Smokers     |
| TCGA     |                                                      |            | -1.7101098 | 0.00269179 | 0.21096279 | TUMOR  | Non-Smokers |
| GSE50081 | LEUKOCYTE_ACTIVATION                                 | GO:0045321 | -1.6960053 | 0.002331   | 0.09904125 | TUMOR  | Smokers     |
| GSE47115 |                                                      |            | -1.9095325 | 0          | 0.10273132 | TUMOR  | Smokers     |
| GSE32863 |                                                      |            | -1.6817983 | 0.00189036 | 0.1565814  | TUMOR  | Non-Smokers |
| GSE32863 |                                                      |            | -1.569123  | 0.00513699 | 0.22044884 | TUMOR  | Smokers     |
| GSE50081 | REGULATION_OF_CYTOKINE_BIOSYNTHETIC_PROCESS          | GO:0042035 | -1.9554288 | 0          | 0.01938074 | TUMOR  | Smokers     |
| GSE50081 |                                                      |            | -1.7510277 | 0.00442478 | 0.15727207 | TUMOR  | Non-Smokers |
| GSE47115 |                                                      |            | -1.6818967 | 0.01286174 | 0.21014212 | TUMOR  | Smokers     |
| GSE32863 |                                                      |            | -1.6633716 | 0.00181159 | 0.16754858 | TUMOR  | Smokers     |
| GSE50081 | RESPONSE_TO_EXTERNAL_STIMULUS                        | GO:0009605 | -1.8335316 | 0          | 0.04974858 | TUMOR  | Smokers     |
| GSE32863 |                                                      |            | -1.8440604 | 0          | 0.06911543 | TUMOR  | Non-Smokers |
| GSE32863 |                                                      |            | -1.7571218 | 0          | 0.10927048 | TUMOR  | Smokers     |
| TCGA     |                                                      |            | -1.8645161 | 0          | 0.06991231 | TUMOR  | Smokers     |
| GSE50081 | RESPONSE_TO_WOUNDING                                 | GO:0009611 | -1.8946304 | 0          | 0.03428209 | TUMOR  | Smokers     |
| GSE32863 |                                                      |            | -1.6511477 | 0          | 0.18542273 | TUMOR  | Non-Smokers |
| GSE32863 |                                                      |            | -1.843025  | 0          | 0.07233741 | TUMOR  | Smokers     |
| TCGA     |                                                      |            | -1.8400553 | 0          | 0.07388143 | TUMOR  | Smokers     |
| GSE50081 | T_CELL_ACTIVATION                                    | GO:0042110 | -1.699743  | 0.00954654 | 0.09822804 | TUMOR  | Smokers     |
| GSE47115 |                                                      |            | -1.8975077 | 0          | 0.07193277 | TUMOR  | Smokers     |
| GSE10072 |                                                      |            | -1.6644487 | 0.00420168 | 0.11739676 | NORMAL | Non-Smokers |
| GSE32863 |                                                      |            | -1.6042974 | 0.01275046 | 0.19601727 | TUMOR  | Non-Smokers |
| GSE47115 | CELL_ACTIVATION                                      | GO:0001775 | -1.9293643 | 0          | 0.12010915 | TUMOR  | Smokers     |
| GSE32863 |                                                      |            | -1.5814444 | 0.00700525 | 0.22325641 | TUMOR  | Non-Smokers |
| GSE32863 |                                                      |            | -1.5563774 | 0.00521739 | 0.23158695 | TUMOR  | Smokers     |
| GSE47115 | CELL_CELL_SIGNALING                                  | GO:0007267 | -1.5803511 | 0          | 0.21147372 | TUMOR  | Smokers     |
| GSE10072 |                                                      |            | -1.8602321 | 0          | 0.06949831 | NORMAL | Non-Smokers |
| GSE10072 |                                                      |            | -1.8501779 | 0          | 0.00797819 | TUMOR  | Non-Smokers |
| GSE50081 | CYTOKINE_METABOLIC_PROCESS                           | GO:0042107 | -2.0086787 | 0          | 0.01374719 | TUMOR  | Smokers     |
| GSE50081 |                                                      |            | -1.6498977 | 0.00412655 | 0.21309516 | TUMOR  | Non-Smokers |
| GSE10072 |                                                      |            | -1.6593872 | 0.00842697 | 0.11989322 | NORMAL | Non-Smokers |
| GSE47115 | LYMPHOCYTE_ACTIVATION                                | GO:0046649 | -1.875324  | 0          | 0.08219407 | TUMOR  | Smokers     |
| GSE10072 |                                                      |            | -1.6515247 | 0.0056101  | 0.11965143 | NORMAL | Non-Smokers |
| GSE32863 |                                                      |            | -1.7409751 | 0.00174825 | 0.10906782 | TUMOR  | Non-Smokers |
| GSE50081 | POSITIVE_REGULATION_OF_CYTOKINE_BIOSYNTHETIC_PROCESS | GO:0042108 | -1.9891311 | 0          | 0.01680089 | TUMOR  | Smokers     |
| GSE50081 |                                                      |            | -1.6402935 | 0.01424502 | 0.21301033 | TUMOR  | Non-Smokers |
| GSE47115 |                                                      |            | -1.7606636 | 0.00656814 | 0.16079095 | TUMOR  | Smokers     |
| GSE10072 | POSITIVE_REGULATION_OF_T_CELL_PROLIFERATION          | GO:0042102 | -1.6158615 | 0.02419355 | 0.13315406 | NORMAL | Non-Smokers |
| GSE32863 |                                                      |            | -1.6191905 | 0.01325758 | 0.18311827 | TUMOR  | Non-Smokers |
| TCGA     |                                                      |            | -1.9364585 | 0          | 0.13259144 | TUMOR  | Non-Smokers |

|          |                                                  |            |            |            |            |        |             |
|----------|--------------------------------------------------|------------|------------|------------|------------|--------|-------------|
| GSE50081 | REGULATION_OF_DEFENSE_RESPONSE                   | GO:0031347 | -2.1020842 | 0          | 0.00734997 | TUMOR  | Smokers     |
| TCGA     |                                                  |            | -1.741655  | 0.00544465 | 0.07487477 | TUMOR  | Smokers     |
| TCGA     |                                                  |            | -1.6764903 | 0.00571429 | 0.1941017  | TUMOR  | Non-Smokers |
| GSE47115 | REGULATION_OF_LYMPHOCYTE_ACTIVATION              | GO:0051249 | -1.6254781 | 0.01151316 | 0.20639502 | TUMOR  | Smokers     |
| GSE10072 |                                                  |            | -1.7079116 | 0.00851064 | 0.10882808 | NORMAL | Non-Smokers |
| GSE32863 |                                                  |            | -1.5609378 | 0.02317291 | 0.24410667 | TUMOR  | Non-Smokers |
| GSE50081 | RESPONSE_TO_OTHER_ORGANISM                       | GO:0051707 | -1.8548871 | 0          | 0.04535616 | TUMOR  | Smokers     |
| GSE10072 |                                                  |            | -1.7059491 | 0.00266312 | 0.10713203 | NORMAL | Non-Smokers |
| GSE32863 |                                                  |            | -1.7908653 | 0          | 0.09373694 | TUMOR  | Smokers     |
| GSE50081 | ADAPTIVE_IMMUNE_RESPONSE_GO_0002460              | GO:0002460 | -1.9808283 | 0.00225734 | 0.01717944 | TUMOR  | Smokers     |
| GSE47115 |                                                  |            | -1.6431261 | 0.01372213 | 0.23233375 | TUMOR  | Smokers     |
| GSE10072 | CELL_SURFACE_RECEPTOR_LINKED_SIGNAL_TRANSDUCTION | GO:0007166 | -1.5847944 | 0          | 0.12821138 | TUMOR  | Non-Smokers |
| TCGA     |                                                  |            | -2.0441449 | 0          | 0.08256079 | TUMOR  | Smokers     |
| GSE47115 | DEFENSE_RESPONSE_TO_VIRUS                        | GO:0051607 | -1.6288024 | 0.02360877 | 0.21492128 | TUMOR  | Smokers     |
| GSE32863 |                                                  |            | -1.575936  | 0.0291439  | 0.22438057 | TUMOR  | Smokers     |
| GSE50081 | IMMUNE_EFFECTOR_PROCESS                          | GO:0002252 | -1.709698  | 0.00980392 | 0.09298511 | TUMOR  | Smokers     |
| GSE50081 |                                                  |            | -1.6035817 | 0.01014493 | 0.2239497  | TUMOR  | Non-Smokers |
| GSE10072 | IMMUNE_SYSTEM_DEVELOPMENT                        | GO:0002520 | -1.7130586 | 0          | 0.11296329 | NORMAL | Non-Smokers |
| GSE32863 |                                                  |            | -1.8994037 | 0          | 0.04719496 | TUMOR  | Non-Smokers |
| GSE50081 | INTERLEUKIN_8_PRODUCTION                         | GO:0032637 | -1.7731749 | 0.00860215 | 0.06707466 | TUMOR  | Smokers     |
| GSE32863 |                                                  |            | -1.738181  | 0.00369004 | 0.11667174 | TUMOR  | Smokers     |
| GSE50081 | LEUKOCYTE_CHEMOTAXIS                             | GO:0030595 | -2.0317585 | 0          | 0.01258163 | TUMOR  | Smokers     |
| GSE32863 |                                                  |            | -1.9470302 | 0          | 0.04376491 | TUMOR  | Smokers     |
| GSE10072 | LEUKOCYTE_DIFFERENTIATION                        | GO:0002521 | -1.6486496 | 0.00983146 | 0.1197386  | NORMAL | Non-Smokers |
| GSE32863 |                                                  |            | -1.6513519 | 0.00902527 | 0.16752724 | TUMOR  | Smokers     |
| GSE32863 | POSITIVE_REGULATION_OF_LYMPHOCYTE_ACTIVATION     | GO:0051251 | -1.6488091 | 0.015625   | 0.17774025 | TUMOR  | Non-Smokers |
| TCGA     |                                                  |            | -1.8128265 | 0.00135685 | 0.17338015 | TUMOR  | Non-Smokers |
| GSE50081 | POSITIVE_REGULATION_OF_RESPONSE_TO_STIMULUS      | GO:0048584 | -2.0761623 | 0          | 0.00875345 | TUMOR  | Smokers     |
| GSE32863 |                                                  |            | -1.5888414 | 0.01241135 | 0.20886502 | TUMOR  | Smokers     |
| GSE32863 | POSITIVE_REGULATION_OF_T_CELL_ACTIVATION         | GO:0050870 | -1.6226203 | 0.02010969 | 0.18688846 | TUMOR  | Non-Smokers |
| TCGA     |                                                  |            | -1.8057642 | 0.00141844 | 0.15253495 | TUMOR  | Non-Smokers |
| GSE50081 | REGULATION_OF_IMMUNE_RESPONSE                    | GO:0050776 | -1.7685797 | 0.00227273 | 0.06802931 | TUMOR  | Smokers     |
| TCGA     |                                                  |            | -1.5875516 | 0.01312336 | 0.24561612 | TUMOR  | Non-Smokers |
| GSE50081 | REGULATION_OF_RESPONSE_TO_EXTERNAL_STIMULUS      | GO:0032101 | -1.8560536 | 0.00421053 | 0.04670648 | TUMOR  | Smokers     |
| GSE32863 |                                                  |            | -1.6045786 | 0.03345725 | 0.19964395 | TUMOR  | Smokers     |

|          |                                    |            |            |            |            |        |             |
|----------|------------------------------------|------------|------------|------------|------------|--------|-------------|
| GSE50081 | REGULATION_OF_RESPONSE_TO_STIMULUS | GO:0048583 | -2.0516105 | 0          | 0.0110049  | TUMOR  | Smokers     |
| GSE32863 | REGULATION_OF_RESPONSE_TO_STIMULUS | GO:0048583 | -1.7097533 | 0          | 0.13092537 | TUMOR  | Smokers     |
| GSE47115 | REGULATION_OF_T_CELL_ACTIVATION    | GO:0050863 | -1.7484587 | 0.00519031 | 0.14171112 | TUMOR  | Smokers     |
| GSE10072 | REGULATION_OF_T_CELL_ACTIVATION    | GO:0050863 | -1.8635097 | 0.00297177 | 0.07846844 | NORMAL | Non-Smokers |
| GSE50081 | RESPONSE_TO_BIOTIC_STIMULUS        | GO:0009607 | -1.6900933 | 0          | 0.10112421 | TUMOR  | Smokers     |
| GSE10072 | RESPONSE_TO_BIOTIC_STIMULUS        | GO:0009607 | -1.6458721 | 0          | 0.12015209 | NORMAL | Non-Smokers |
| GSE50081 | RESPONSE_TO_VIRUS                  | GO:0009615 | -1.81758   | 0.00251889 | 0.04865548 | TUMOR  | Smokers     |
| GSE32863 | RESPONSE_TO_VIRUS                  | GO:0009615 | -1.8700213 | 0.0018315  | 0.05679273 | TUMOR  | Smokers     |

**Supplementary Table S2: Results of gsea analysis in all cohorts**

**Supplementary Table S2.1: GSE10072: Never smokers, normal tissue, enriched in male**

**Supplementary Table S3: Overrepresented genes related to immune system in all cohorts**

**Supplementary Table S4:**

CIBERSORT-inferred fractions of tumor-associated leukocytes in NSCLC

| Data set                          | Platform    | No. samples shown (P<0.05) | Total samples analyzed | B cells naive | B cells memory | Plasma cells | T cells CD8 | T cells CD4 naive | T cells CD4 memory RO unactivated | T cells CD4 memory RO activated | T cells follicular helper | T cells gamma delta | NK cells regulatory (Tregs) | NK cells unstimulated | Monocytes | Macrophages M0 | Macrophages M1 | Macrophages M2 | Dendritic cells unstimulated | Dendritic cells stimulated | Mast cells unstimulated | Mast cells stimulated (IgE) | Eosinophils | Neutrophils |      |
|-----------------------------------|-------------|----------------------------|------------------------|---------------|----------------|--------------|-------------|-------------------|-----------------------------------|---------------------------------|---------------------------|---------------------|-----------------------------|-----------------------|-----------|----------------|----------------|----------------|------------------------------|----------------------------|-------------------------|-----------------------------|-------------|-------------|------|
| GSE50081 Men Smokers Tumor        | HGU133Plus2 | 36                         | 36                     | 0.01          | 0.03           | 0.38         | 0.09        | 0.02              | 0.01                              | 0.02                            | 0.03                      | 0.01                | 0.01                        | 0.01                  | 0.02      | 0.01           | 0.11           | 0.03           | 0.14                         | 0.01                       | 0.01                    | 0.04                        | 0.01        | 0.03        | 0.01 |
| GSE50081 Women Smokers Tumor      | HGU133Plus2 | 20                         | 21                     | 0.01          | 0.01           | 0.39         | 0.09        | 0.02              | 0.01                              | 0.03                            | 0.03                      | 0.01                | 0.01                        | 0.01                  | 0.03      | 0.01           | 0.08           | 0.04           | 0.14                         | 0.02                       | 0.01                    | 0.03                        | 0.01        | 0.03        | 0.02 |
| GSE10072 Men Smokers Tumor        | HGU133A     | 16                         | 16                     | 0.01          | 0.07           | 0.22         | 0.13        | 0.01              | 0.03                              | 0.00                            | 0.03                      | 0.01                | 0.01                        | 0.01                  | 0.00      | 0.03           | 0.06           | 0.17           | 0.04                         | 0.03                       | 0.04                    | 0.05                        | 0.00        | 0.03        |      |
| GSE10072 Women Smokers Tumor      | HGU133A     | 8                          | 8                      | 0.00          | 0.07           | 0.28         | 0.12        | 0.00              | 0.02                              | 0.01                            | 0.03                      | 0.02                | 0.01                        | 0.01                  | 0.01      | 0.02           | 0.05           | 0.14           | 0.05                         | 0.02                       | 0.07                    | 0.02                        | 0.00        | 0.03        |      |
| GSE10072 Men Smokers Normal       | HGU133A     | 12                         | 12                     | 0.01          | 0.05           | 0.12         | 0.15        | 0.00              | 0.04                              | 0.00                            | 0.03                      | 0.02                | 0.00                        | 0.03                  | 0.00      | 0.04           | 0.02           | 0.19           | 0.04                         | 0.03                       | 0.12                    | 0.05                        | 0.03        | 0.05        |      |
| GSE10072 Women Smokers Normal     | HGU133A     | 4                          | 4                      | 0.00          | 0.09           | 0.07         | 0.12        | 0.00              | 0.08                              | 0.00                            | 0.01                      | 0.00                | 0.00                        | 0.04                  | 0.00      | 0.03           | 0.04           | 0.00           | 0.17                         | 0.04                       | 0.04                    | 0.14                        | 0.07        | 0.00        | 0.05 |
| GSE10072 Men Non-Smokers Normal   | HGU133A     | 4                          | 4                      | 0.00          | 0.07           | 0.06         | 0.12        | 0.00              | 0.09                              | 0.00                            | 0.03                      | 0.00                | 0.00                        | 0.05                  | 0.01      | 0.02           | 0.00           | 0.02           | 0.21                         | 0.02                       | 0.04                    | 0.17                        | 0.04        | 0.00        | 0.06 |
| GSE10072 Women Non-Smokers Normal | HGU133A     | 11                         | 11                     | 0.01          | 0.06           | 0.09         | 0.15        | 0.00              | 0.06                              | 0.00                            | 0.04                      | 0.01                | 0.00                        | 0.03                  | 0.01      | 0.02           | 0.00           | 0.03           | 0.19                         | 0.02                       | 0.03                    | 0.13                        | 0.05        | 0.00        | 0.05 |
| GSE10072 Men Non-Smokers Tumor    | HGU133A     | 3                          | 3                      | 0.00          | 0.09           | 0.24         | 0.08        | 0.00              | 0.06                              | 0.00                            | 0.05                      | 0.01                | 0.01                        | 0.00                  | 0.02      | 0.01           | 0.02           | 0.04           | 0.18                         | 0.04                       | 0.04                    | 0.08                        | 0.02        | 0.00        | 0.03 |
| GSE10072 Women Non-Smokers Tumor  | HGU133A     | 13                         | 13                     | 0.01          | 0.08           | 0.21         | 0.10        | 0.00              | 0.06                              | 0.00                            | 0.03                      | 0.02                | 0.00                        | 0.01                  | 0.00      | 0.01           | 0.02           | 0.02           | 0.17                         | 0.06                       | 0.04                    | 0.08                        | 0.04        | 0.00        | 0.03 |
| GSE50081 Men Non-Smokers Tumor    | HGU133Plus2 | 6                          | 6                      | 0.01          | 0.06           | 0.32         | 0.07        | 0.03              | 0.02                              | 0.00                            | 0.03                      | 0.01                | 0.02                        | 0.00                  | 0.03      | 0.01           | 0.05           | 0.03           | 0.15                         | 0.06                       | 0.01                    | 0.08                        | 0.00        | 0.00        | 0.01 |
| GSE50081 Women Non-Smokers Tumor  | HGU133Plus2 | 18                         | 18                     | 0.01          | 0.02           | 0.35         | 0.08        | 0.02              | 0.03                              | 0.01                            | 0.02                      | 0.01                | 0.01                        | 0.00                  | 0.03      | 0.01           | 0.10           | 0.02           | 0.15                         | 0.04                       | 0.01                    | 0.06                        | 0.01        | 0.03        | 0.01 |
